# Supplementary material for: Mendelian randomization study of thyroid function and anti-Müllerian hormone levels
Source: PubMed Central journal article supplement (PMC10400324; doi:10.3389/fendo.2023.1188284), 2023-07-20

**A**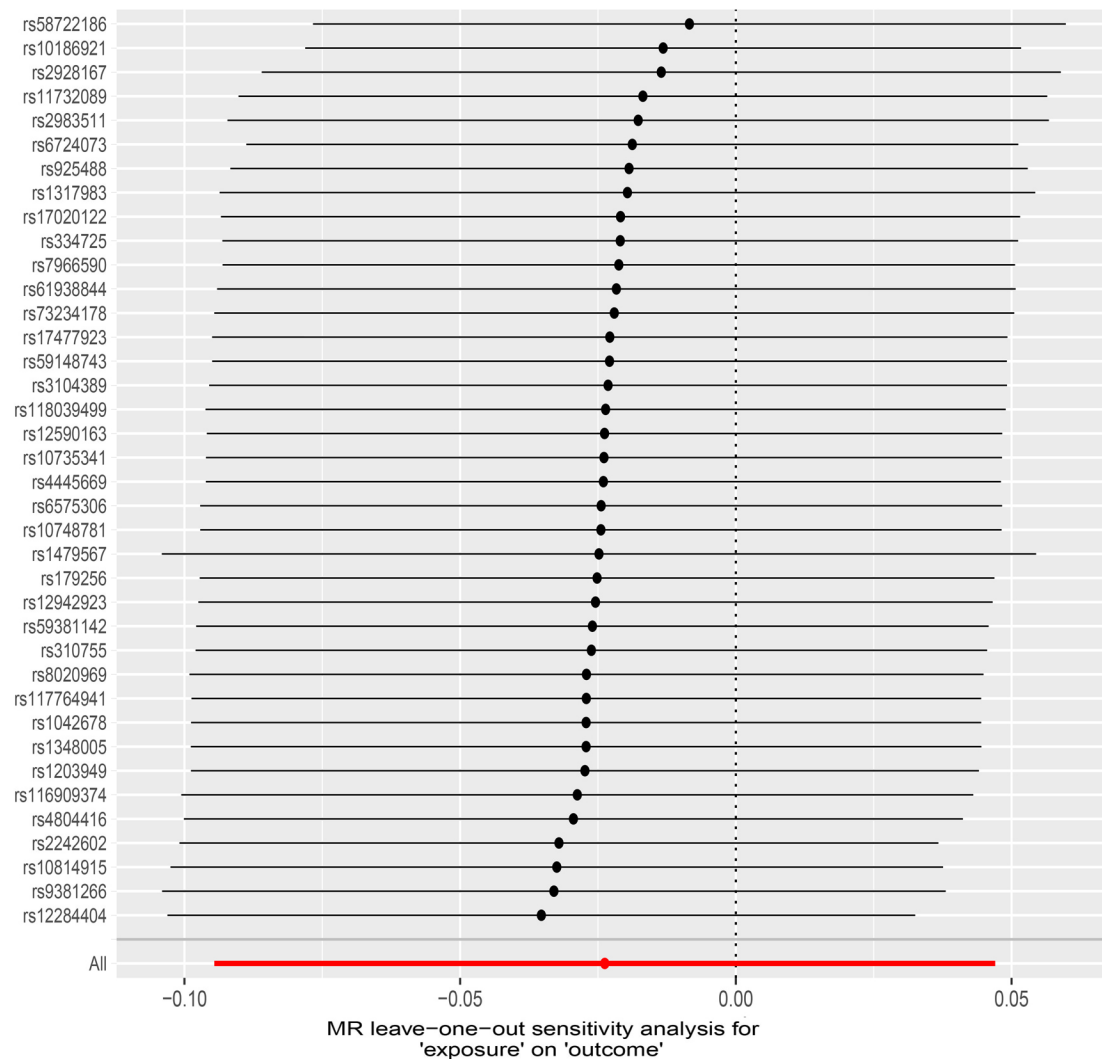**B**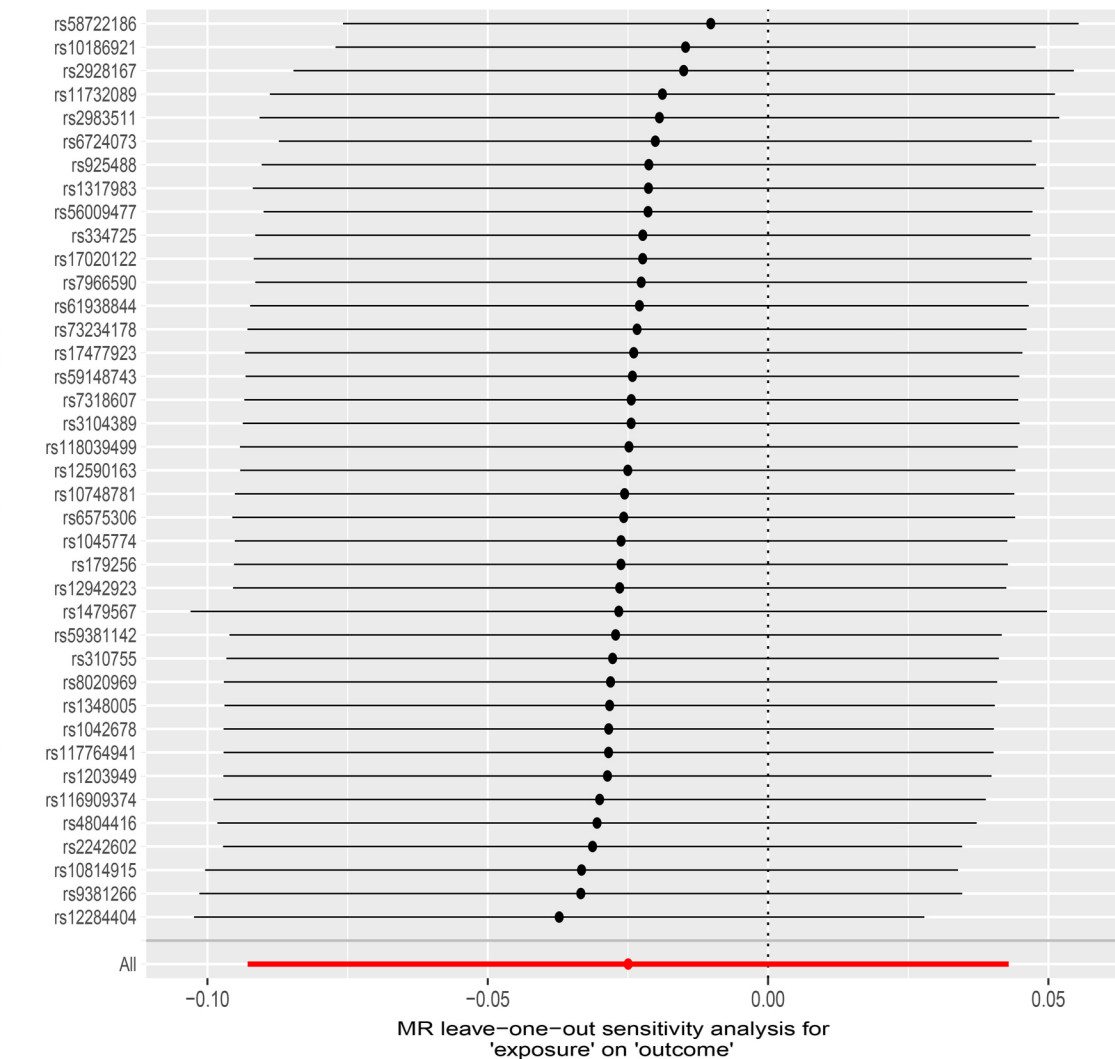**C**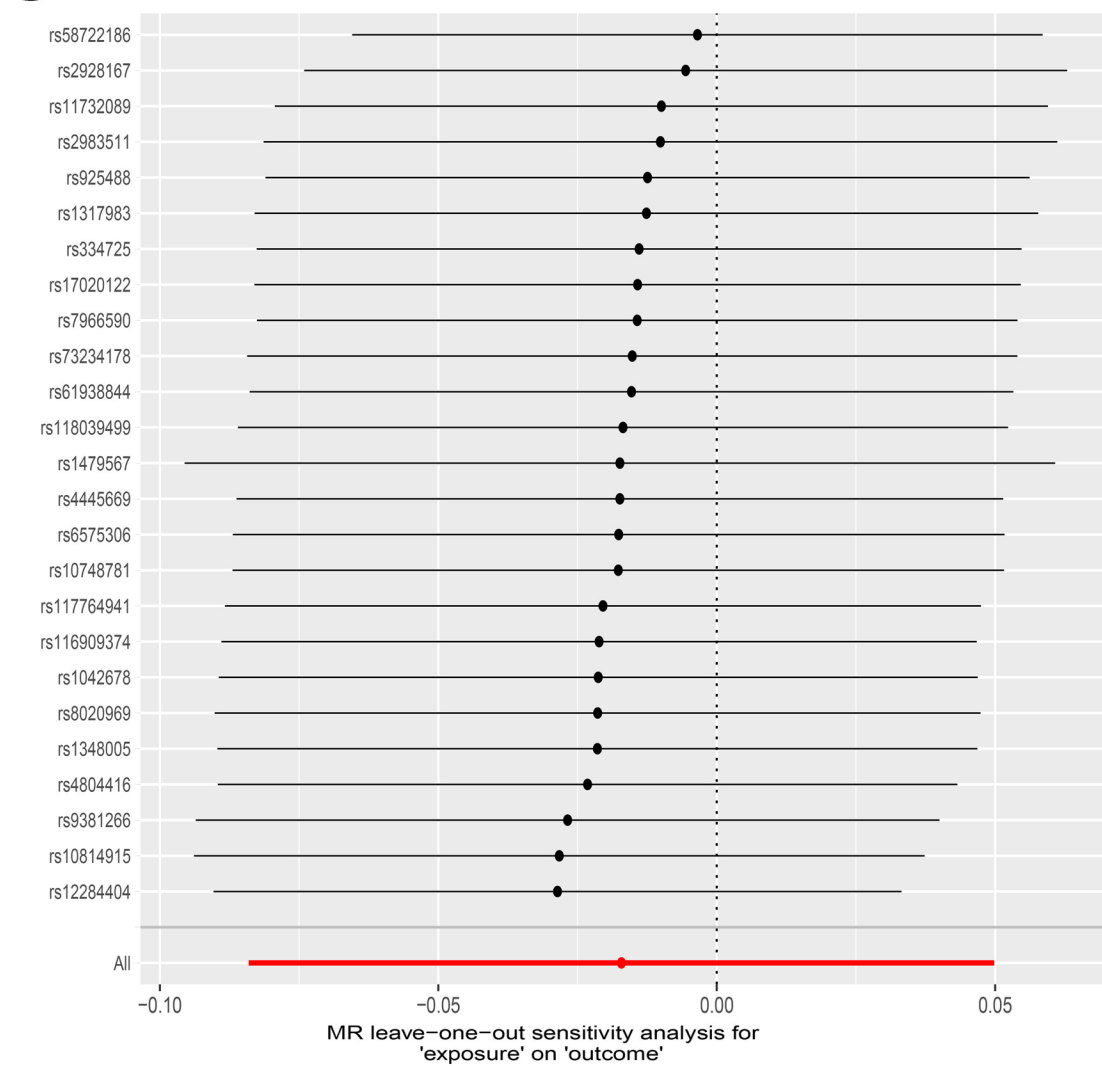**D**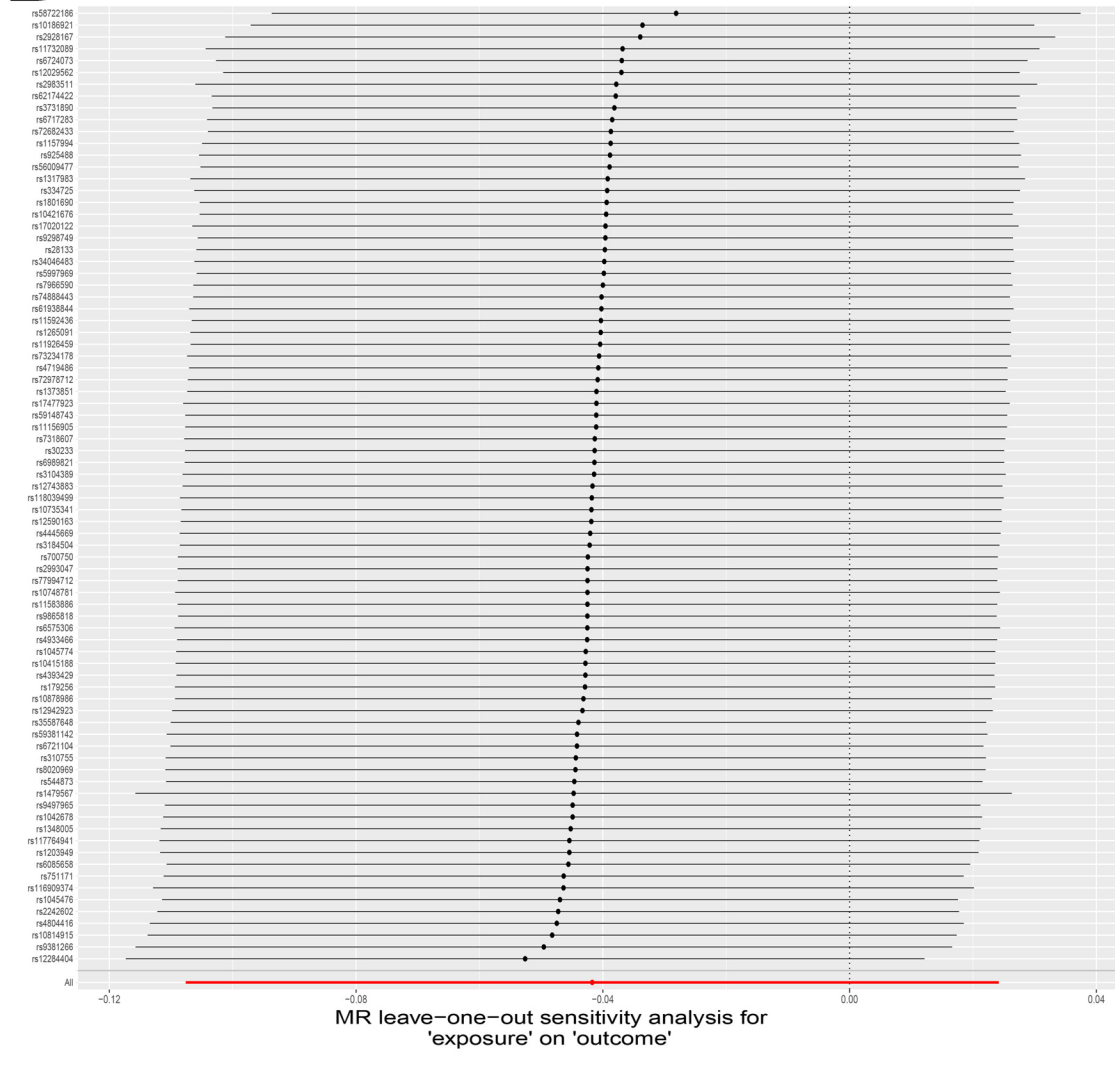

Supplement: Image_8.pdf [file Image_8.pdf]
